# Supplementary material for: The Effect of Cyanobacterial LPS Antagonist (CyP) on Cytokines and Micro-RNA Expression Induced by Porphyromonas gingivalis LPS
Source: MDPI journal article supplement (doi:10.3390/toxins10070290), 2018-07-16
Supplement: s1 [file s1]

## Supplementary Materials: The Effect of Cyanobacterial LPS Antagonist (CyP) on Cytokines and Micro-RNA Expression Induced by *Porphyromonas gingivalis* LPS

Monica Molteni, Annalisa Bosi, and Carlo Rossetti

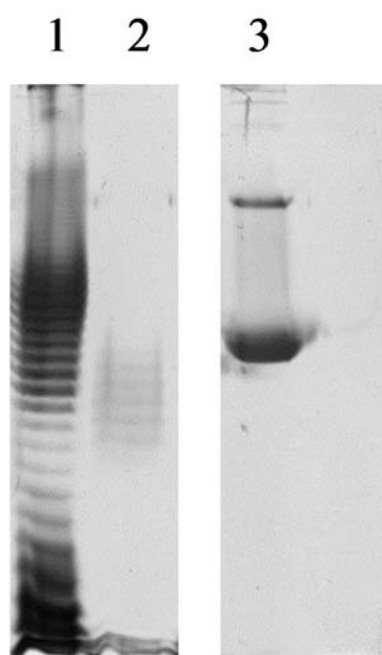

**Figure S1.** SDS-PAGE electrophoresis of LPS and CyP. Ec-LPS, Pg-LPS and CyP were visualized by electrophoresis in SDS-PAGE and silver staining after periodate oxidation. Lane 1: Ec-LPS (serotype O111:B4) 16 µg; lane 2: Pg-LPS 16 µg; lane 3: CyP 8 µg.
